# Supplementary material for: Identifying key bird species and geographical hotspots of avian influenza A (H7N9) virus in China
Source: PubMed Central journal article supplement (PMC6180610; doi:10.1186/s40249-018-0480-x), 2018-10-11

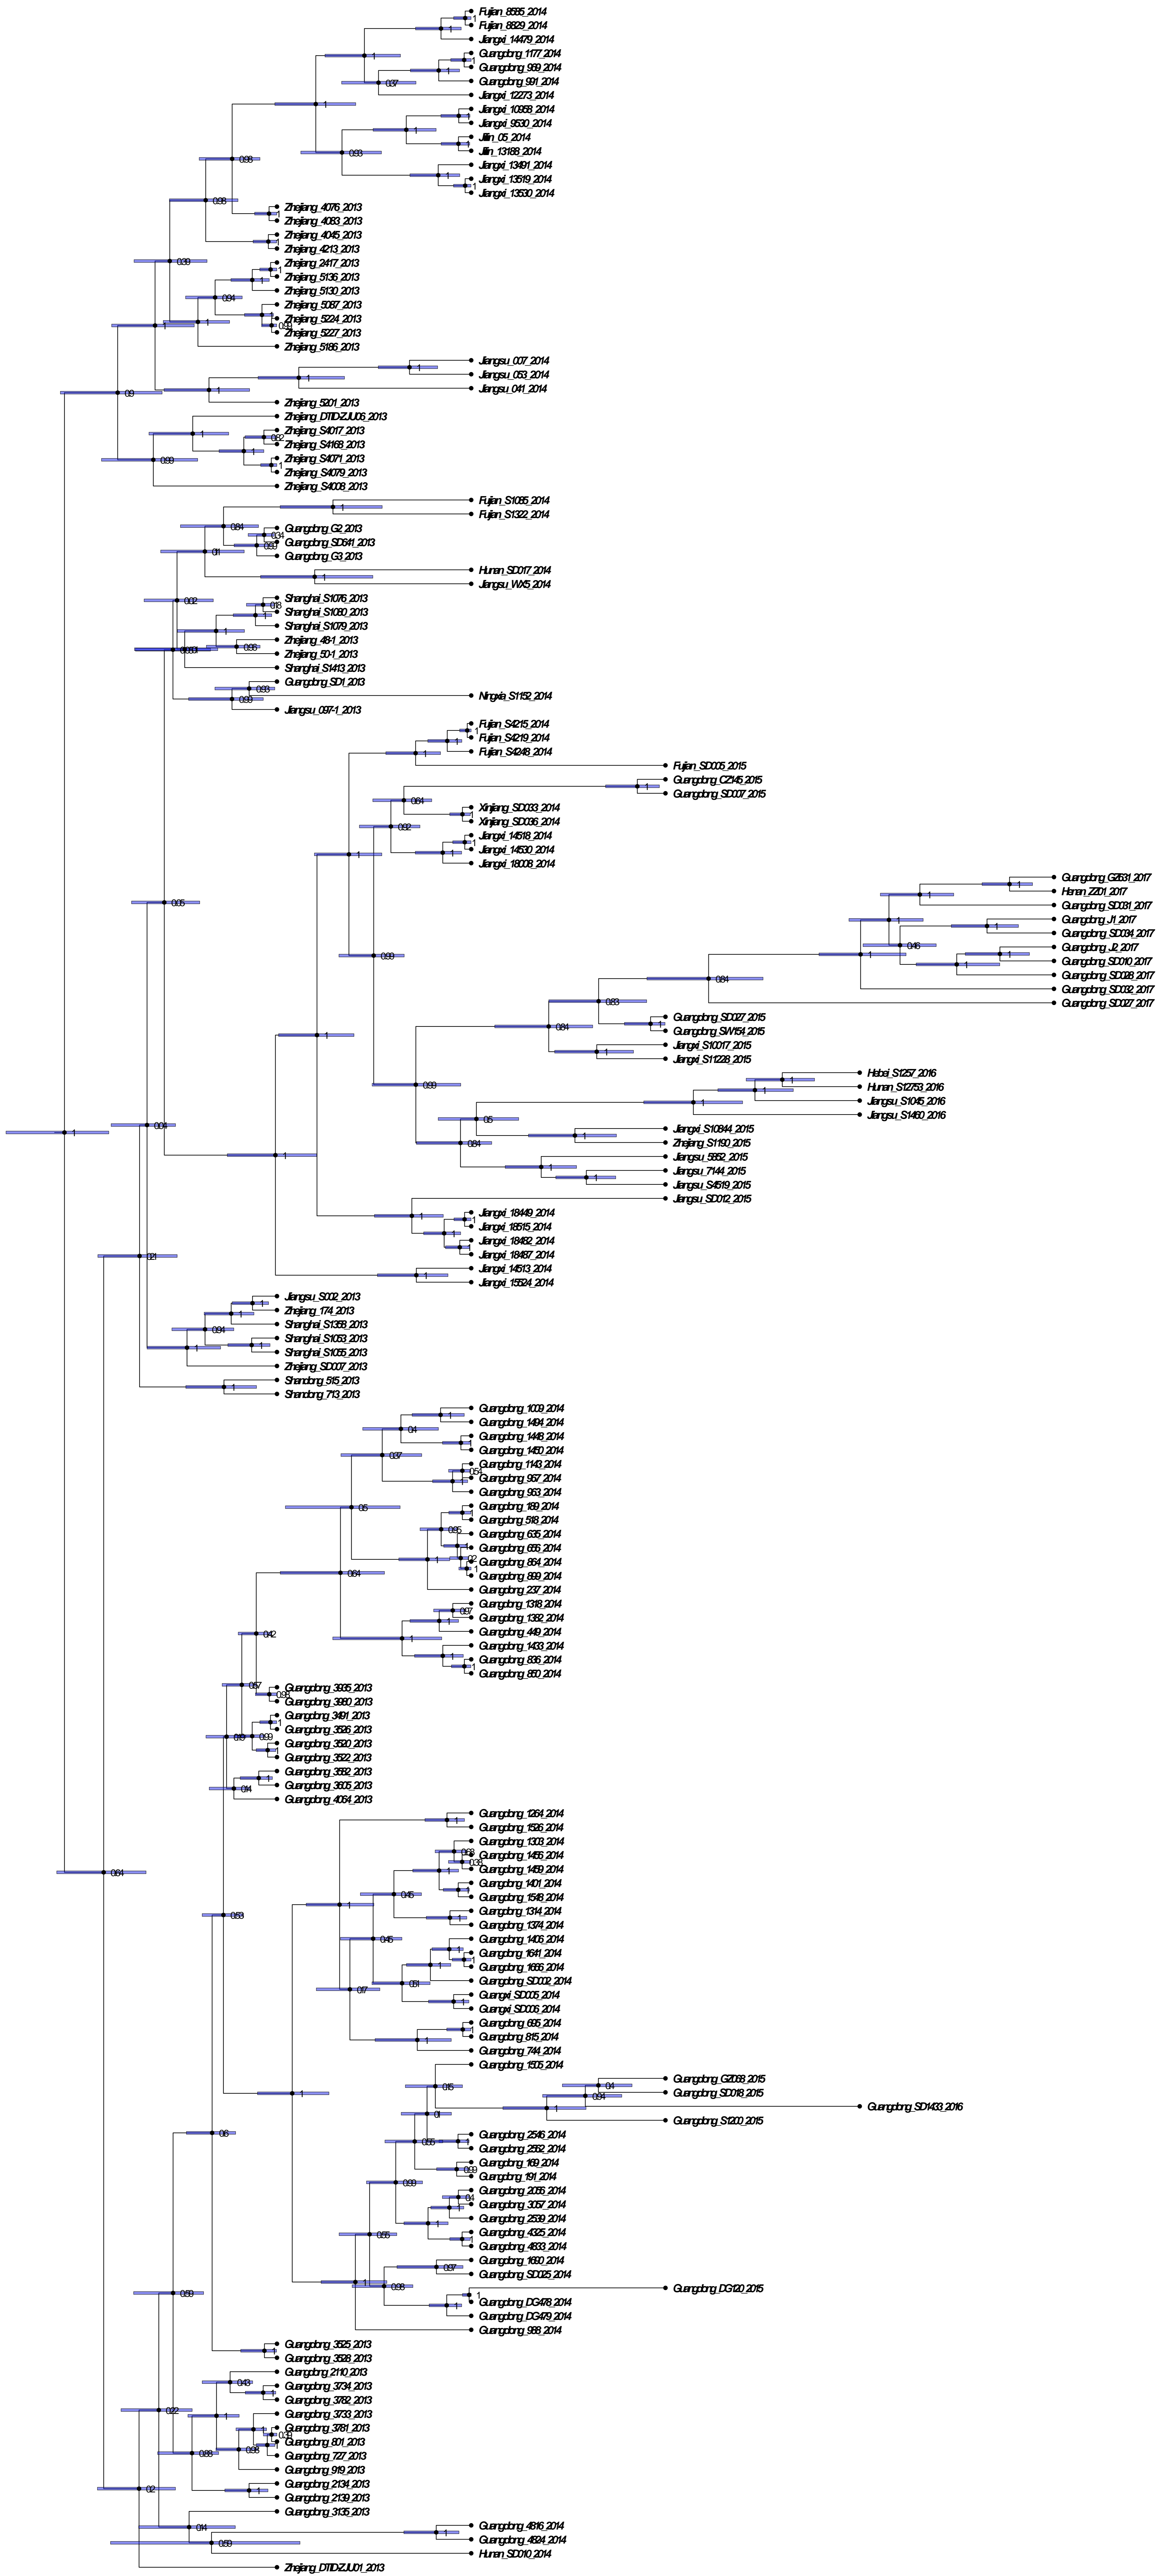

Supplement: 40249_2018_480_MOESM7_ESM.pdf [file 40249_2018_480_MOESM7_ESM.pdf]
