# Supplementary material for: Identifying key bird species and geographical hotspots of avian influenza A (H7N9) virus in China
Source: Infect Dis Poverty. 2018 Oct 11;7:97. doi: 10.1186/s40249-018-0480-x (PMC6180610; doi:10.1186/s40249-018-0480-x)
Supplement: Supplementary file 8 — A list of identified bird species in Shanghai and other five provinces. (XLSX 23 kb) [file 40249_2018_480_MOESM8_ESM.xlsx]

## Sheet: Shanghai
Lag 0-5
Bird Id	Scientific Name	English Name
67	Cygnus cygnus	Whooper Swan
72	Anser erythropus	Lesser White-fronted Goose
81	Tadorna tadorna	Common Shelduck
85	Mareca strepera	Gadwall
86	Mareca falcata	Falcated Duck
87	Mareca penelope	Eurasian Wigeon
92	Spatula clypeata	Northern Shoveler
94	Spatula querquedula	Garganey
95	Sibirionetta formosa	Baikal Teal
96	Anas crecca	Common Teal
99	Aythya ferina	Common Pochard
111	Mergellus albellus	Smew
302	Grus grus	Common Crane
303	Grus monacha	Hooded Crane
312	Amaurornis akool	Brown Crake
321	Gallicrex cinerea	Watercock
323	Gallinula chloropus	Common Moorhen
328	Scolopax rusticola	Eurasian Woodcock
332	Gallinago stenura	Pintail Snipe
334	Gallinago gallinago	Common Snipe
336	Limosa limosa	Black-tailed Godwit
337	Limosa lapponica	Bar-tailed Godwit
344	Tringa stagnatilis	Marsh Sandpiper
345	Tringa nebularia	Common Greenshank
349	Tringa glareola	Wood Sandpiper
351	Actitis hypoleucos	Common Sandpiper
352	Tringa brevipes	Grey-tailed Tattler
359	Calidris alba	Sanderling
361	Calidris pygmeus	Spoon-billed Sandpiper
364	Calidris temminckii	Temminck's Stint
376	Calidris pugnax	Ruff
377	Phalaropus lobatus	Red-necked Phalarope
388	Pluvialis fulva	Pacific Golden Plover
392	Charadrius dubius	Little Ringed Plover
393	Charadrius alexandrinus	Kentish Plover
396	Charadrius leschenaultii	Greater Sand Plover
398	Charadrius veredus	Oriental Plover
405	Glareola maldivarum	Oriental Pratincole
414	Larus canus	Mew Gull
446	Chlidonias hybrida	Whiskered Tern
518	Tachybaptus ruficollis	Little Grebe
520	Podiceps cristatus	Great Crested Grebe
522	Podiceps nigricollis	Black-necked Grebe
531	Phalacrocorax carbo	Great Cormorant
535	Egretta garzetta	Little Egret
536	Egretta eulophotes	Chinese Egret
539	Ardea cinerea	Grey Heron
541	Ardea purpurea	Purple Heron
542	Ardea alba	Great Egret
543	Ardea intermedia	Intermediate Egret
544	Bubulcus coromandus	Cattle Egret
546	Butorides striata	Striated Heron
547	Nycticorax nycticorax	Black-crowned Night-heron
552	Ixobrychus sinensis	Yellow Bittern
555	Dupetor flavicollis	Black Bittern
556	Botaurus stellaris	Great Bittern
563	Platalea minor	Black-faced Spoonbill

## Sheet: Jiangsu
Lag 0-5
Bird Id	Scientific Name	English Name
69	Anser cygnoides	Swan Goose
84	Aix galericulata	Mandarin Duck
86	Mareca falcata	Falcated Duck
87	Mareca penelope	Eurasian Wigeon
92	Spatula clypeata	Northern Shoveler
96	Anas crecca	Common Teal
112	Mergus serrator	Red-breasted Merganser
310	Rallus aquaticus	Water Rail
312	Amaurornis akool	Brown Crake
313	Amaurornis phoenicurus	White-breasted Waterhen
334	Gallinago gallinago	Common Snipe
339	Numenius phaeopus	Whimbrel
340	Numenius arquata	Eurasian Curlew
345	Tringa nebularia	Common Greenshank
349	Tringa glareola	Wood Sandpiper
351	Actitis hypoleucos	Common Sandpiper
364	Calidris temminckii	Temminck's Stint
386	Himantopus himantopus	Black-winged Stilt
387	Recurvirostra avosetta	Pied Avocet
388	Pluvialis fulva	Pacific Golden Plover
389	Pluvialis squatarola	Grey Plover
391	Charadrius placidus	Long-billed Plover
414	Larus canus	Mew Gull
417	Larus schistisagus	Slaty-backed Gull
520	Podiceps cristatus	Great Crested Grebe
541	Ardea purpurea	Purple Heron
563	Platalea minor	Black-faced Spoonbill
565	Pelecanus crispus	Dalmatian Pelican

## Sheet: Zhejiang
Lag 0-5
Bird Id	Scientific Name	English Name
68	Cygnus columbianus	Tundra Swan
73	Anser anser	Greylag Goose
79	Tadorna ferruginea	Ruddy Shelduck
85	Mareca strepera	Gadwall
86	Mareca falcata	Falcated Duck
89	Anas platyrhynchos	Mallard
95	Sibirionetta formosa	Baikal Teal
112	Mergus serrator	Red-breasted Merganser
113	Mergus squamatus	Scaly-sided Merganser
310	Rallus aquaticus	Water Rail
312	Amaurornis akool	Brown Crake
313	Amaurornis phoenicurus	White-breasted Waterhen
323	Gallinula chloropus	Common Moorhen
324	Fulica atra	Common Coot
328	Scolopax rusticola	Eurasian Woodcock
334	Gallinago gallinago	Common Snipe
337	Limosa lapponica	Bar-tailed Godwit
341	Numenius madagascariensis	Far Eastern Curlew
344	Tringa stagnatilis	Marsh Sandpiper
361	Calidris pygmeus	Spoon-billed Sandpiper
432	Gelochelidon nilotica	Gull-billed Tern
433	Hydroprogne caspia	Caspian Tern
518	Tachybaptus ruficollis	Little Grebe
520	Podiceps cristatus	Great Crested Grebe
521	Podiceps auritus	Horned Grebe
531	Phalacrocorax carbo	Great Cormorant
535	Egretta garzetta	Little Egret
539	Ardea cinerea	Grey Heron
541	Ardea purpurea	Purple Heron
542	Ardea alba	Great Egret
544	Bubulcus coromandus	Cattle Egret
547	Nycticorax nycticorax	Black-crowned Night-heron
556	Botaurus stellaris	Great Bittern
570	Ciconia boyciana	Oriental Stork

## Sheet: Fujian
Lag 0-5
Bird Id	Scientific Name	English Name
68	Cygnus columbianus	Tundra Swan
69	Anser cygnoides	Swan Goose
85	Mareca strepera	Gadwall
87	Mareca penelope	Eurasian Wigeon
334	Gallinago gallinago	Common Snipe
337	Limosa lapponica	Bar-tailed Godwit
341	Numenius madagascariensis	Far Eastern Curlew
363	Calidris ruficollis	Red-necked Stint
364	Calidris temminckii	Temminck's Stint
371	Calidris alpina	Dunlin
387	Recurvirostra avosetta	Pied Avocet
393	Charadrius alexandrinus	Kentish Plover
424	Chroicocephalus ridibundus	Black-headed Gull
426	Chroicocephalus saundersi	Saunders's Gull

## Sheet: Jiangxi
Lag 0-5
Bird Id	Scientific Name	English Name
72	Anser erythropus	Lesser White-fronted Goose
92	Spatula clypeata	Northern Shoveler
387	Recurvirostra avosetta	Pied Avocet
391	Charadrius placidus	Long-billed Plover
424	Chroicocephalus ridibundus	Black-headed Gull
570	Ciconia boyciana	Oriental Stork

## Sheet: Guangdong
Lag 0-5
Bird Id	Scientific Name	English Name
79	Tadorna ferruginea	Ruddy Shelduck
84	Aix galericulata	Mandarin Duck
85	Mareca strepera	Gadwall
86	Mareca falcata	Falcated Duck
87	Mareca penelope	Eurasian Wigeon
92	Spatula clypeata	Northern Shoveler
93	Anas acuta	Northern Pintail
94	Spatula querquedula	Garganey
96	Anas crecca	Common Teal
113	Mergus squamatus	Scaly-sided Merganser
312	Amaurornis akool	Brown Crake
324	Fulica atra	Common Coot
328	Scolopax rusticola	Eurasian Woodcock
336	Limosa limosa	Black-tailed Godwit
340	Numenius arquata	Eurasian Curlew
345	Tringa nebularia	Common Greenshank
351	Actitis hypoleucos	Common Sandpiper
364	Calidris temminckii	Temminck's Stint
371	Calidris alpina	Dunlin
387	Recurvirostra avosetta	Pied Avocet
393	Charadrius alexandrinus	Kentish Plover
413	Larus crassirostris	Black-tailed Gull
421	Larus cachinnans	Yellow-legged Gull
423	Chroicocephalus brunnicephalus	Brown-headed Gull
424	Chroicocephalus ridibundus	Black-headed Gull
426	Chroicocephalus saundersi	Saunders's Gull
433	Hydroprogne caspia	Caspian Tern
446	Chlidonias hybrida	Whiskered Tern
447	Chlidonias leucopterus	White-winged Tern
522	Podiceps nigricollis	Black-necked Grebe
535	Egretta garzetta	Little Egret
539	Ardea cinerea	Grey Heron
542	Ardea alba	Great Egret
543	Ardea intermedia	Intermediate Egret
545	Ardeola bacchus	Chinese Pond-heron
562	Platalea leucorodia	Eurasian Spoonbill
563	Platalea minor	Black-faced Spoonbill
568	Ciconia nigra	Black Stork
